# Supplementary material for: A neural network potential energy surface and quantum dynamics studies for the Ca+(2S) + H2 → CaH+ + H reaction
Source: Royal Society of Chemistry journal article supplement (doi:10.1039/d2cp02711a), 2022-01-01
Supplement: d2cp02711a1.pdf [file d2cp02711a1.pdf]

## **Supporting information for**

### **Neural network potential energy surface and quantum dynamics studies for the $\text{Ca}^+(\text{}^2\text{S}) + \text{H}_2 \rightarrow \text{CaH}^+ + \text{H}$ reaction**

**Zijiang Yang, Hanghang Chen, Ye Mao, Maodu Chen\***

*Key Laboratory of Materials Modification by Laser, Electron, and Ion Beams  
(Ministry of Education), School of Physics, Dalian University of Technology,  
Dalian 116024, PR China*

\*E-mail: [mdchen@dlut.edu.cn](mailto:mdchen@dlut.edu.cn) (M. Chen)

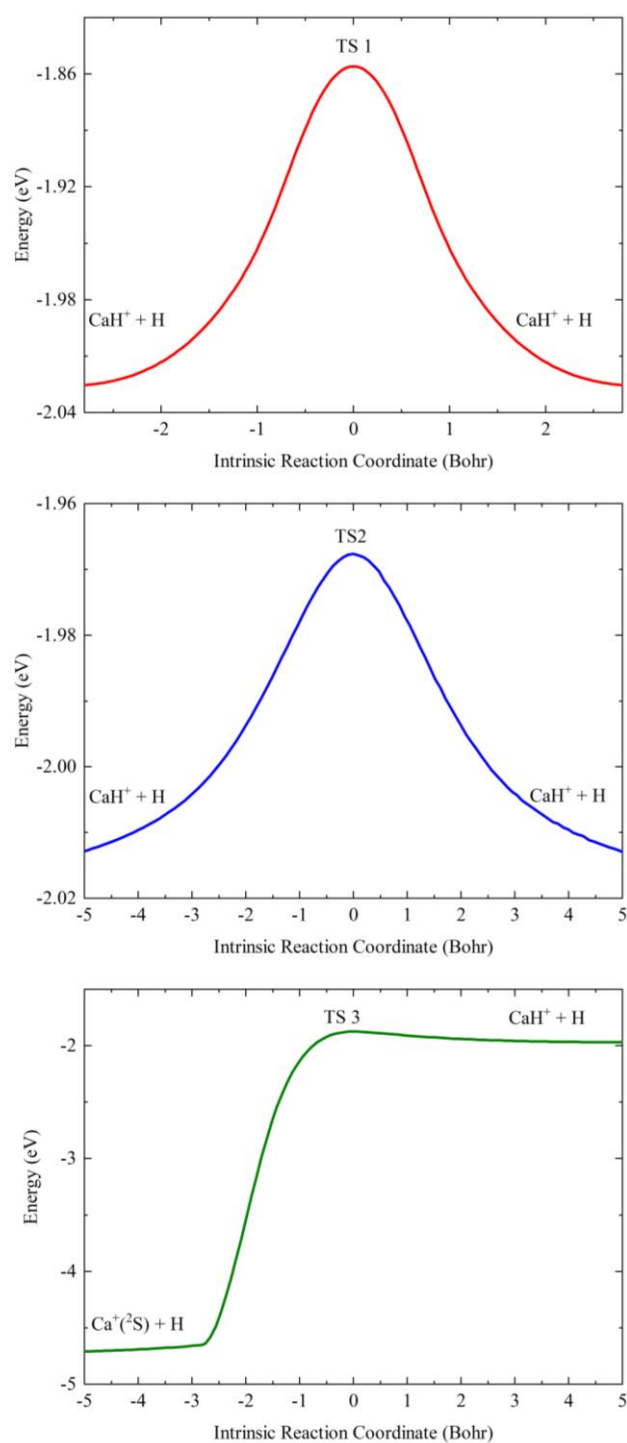

**Fig. S1** IRC analysis of the TS1, TS2 and TS3 for the ground-state  $\text{CaH}_2^+$
